# Supplementary material
Source: PubMed Central journal article supplement (PMC7703657)

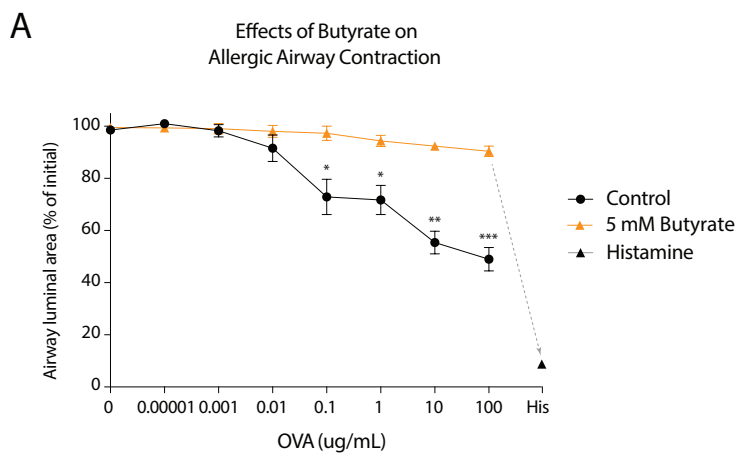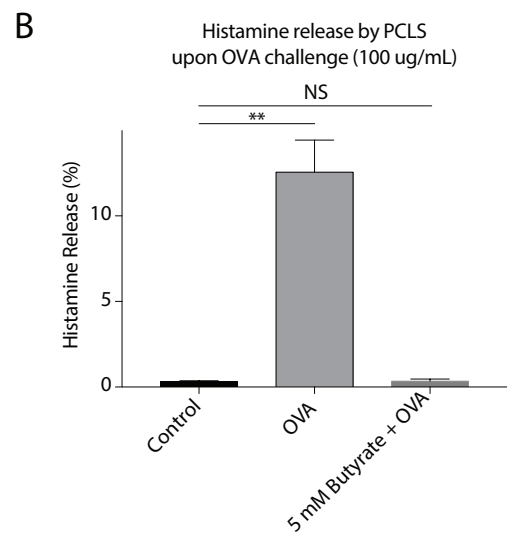

Supplement: NIHMS1647792-supplement-Figure_S1.pdf [file NIHMS1647792-supplement-Figure_S1.pdf]

A

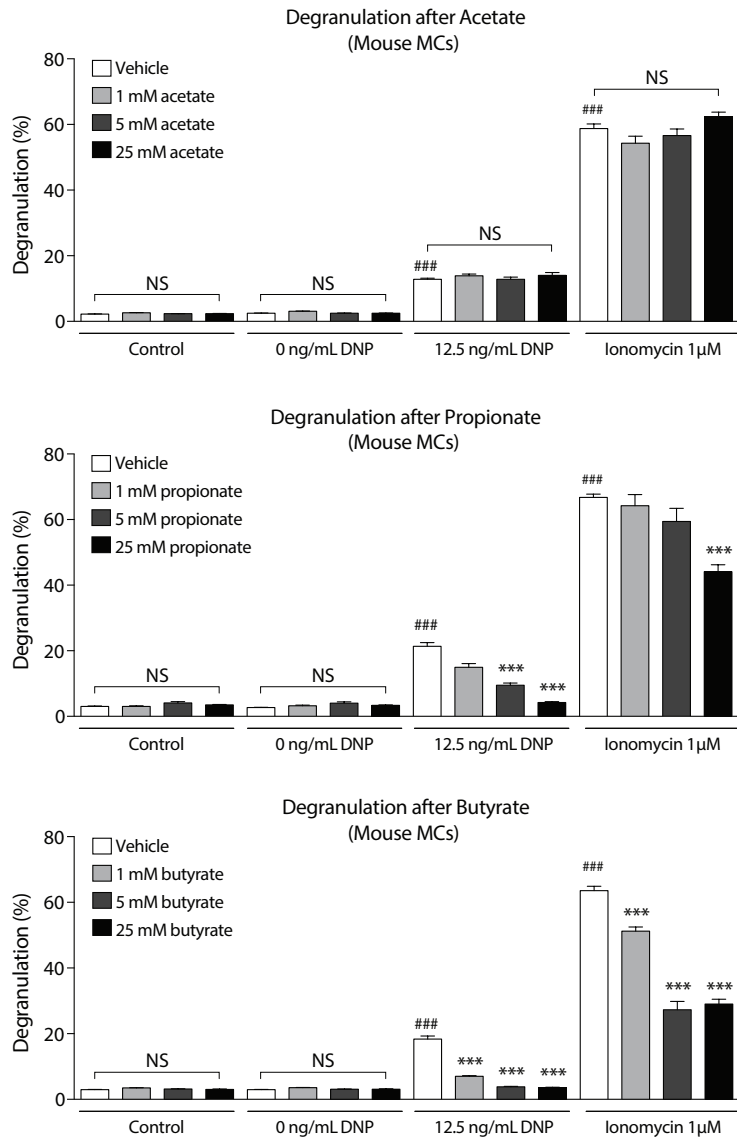

B

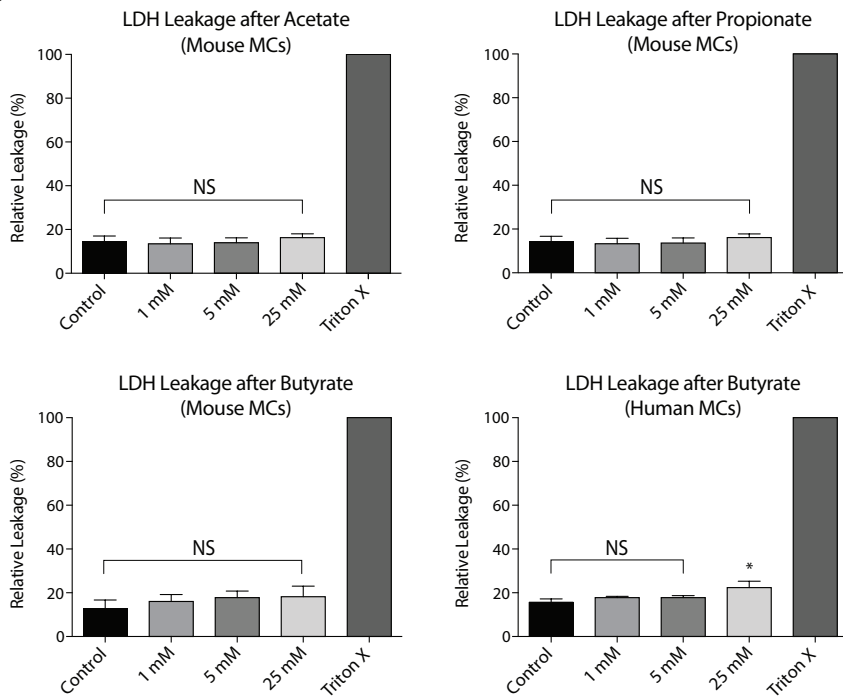

Supplement: NIHMS1647792-supplement-Figure_S2.pdf [file NIHMS1647792-supplement-Figure_S2.pdf]

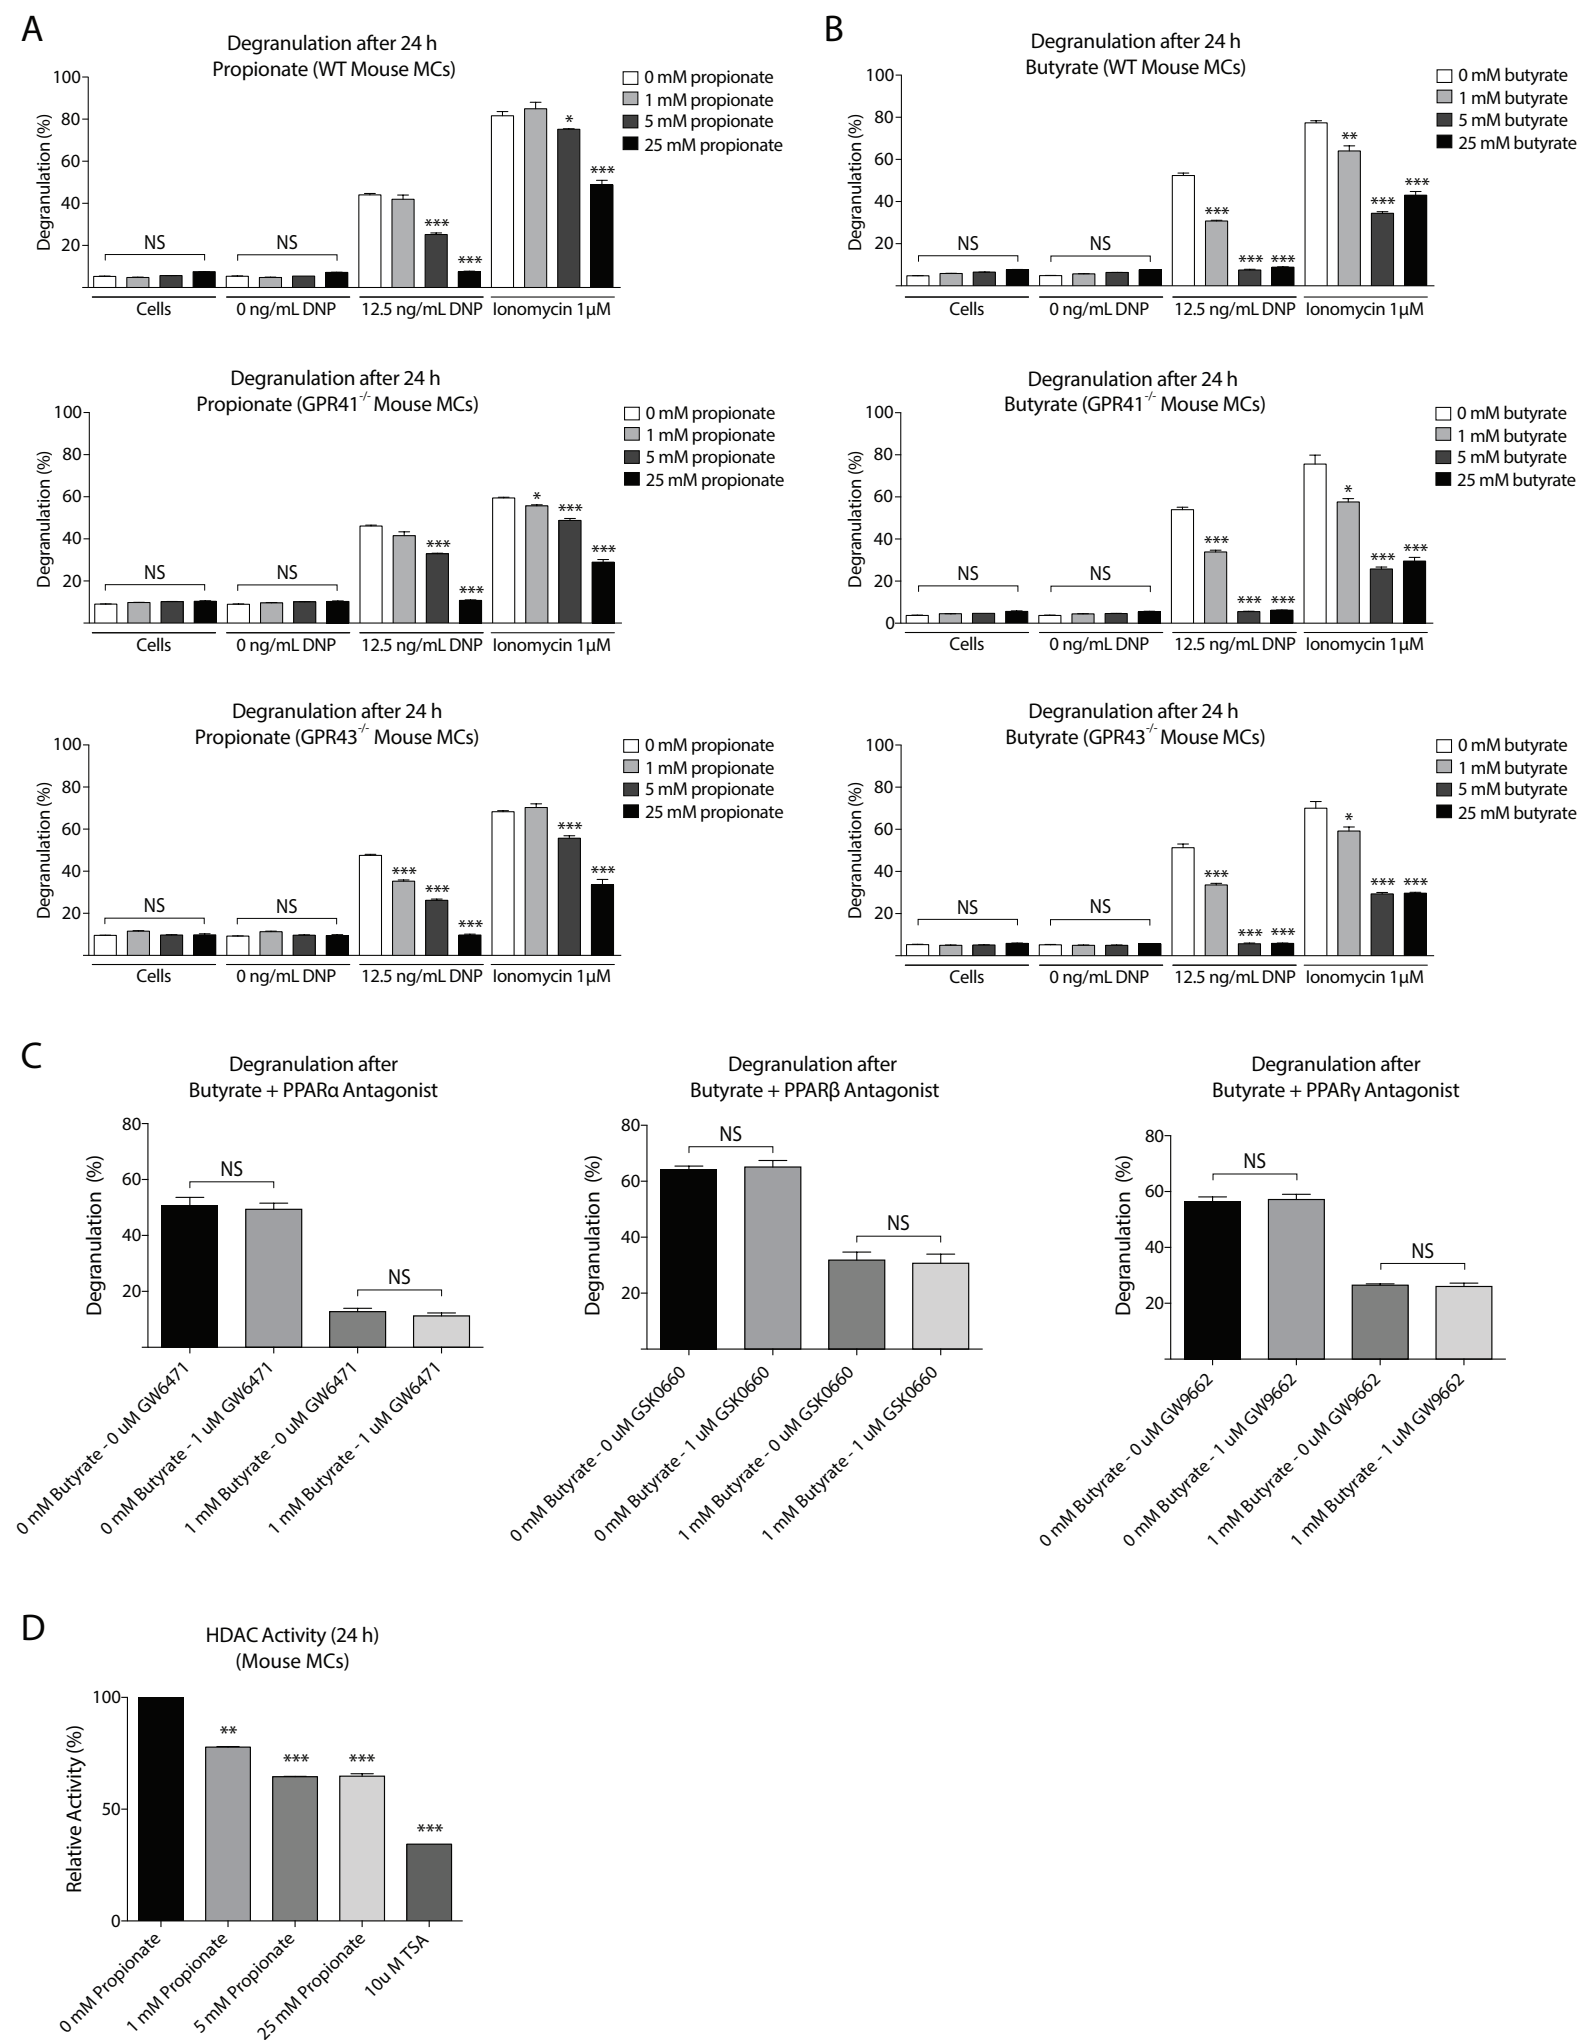

Supplement: NIHMS1647792-supplement-Figure_S3.pdf [file NIHMS1647792-supplement-Figure_S3.pdf]

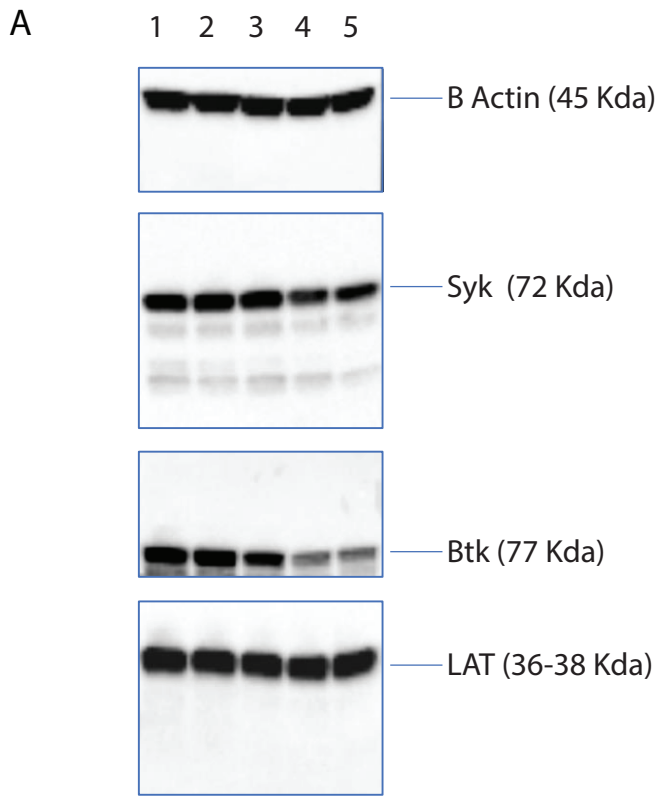

1 Control  
 2 0mM Butyrate  
 3 1mM Butyrate  
 4 5mM Butyrate  
 5 25mM Butyrate

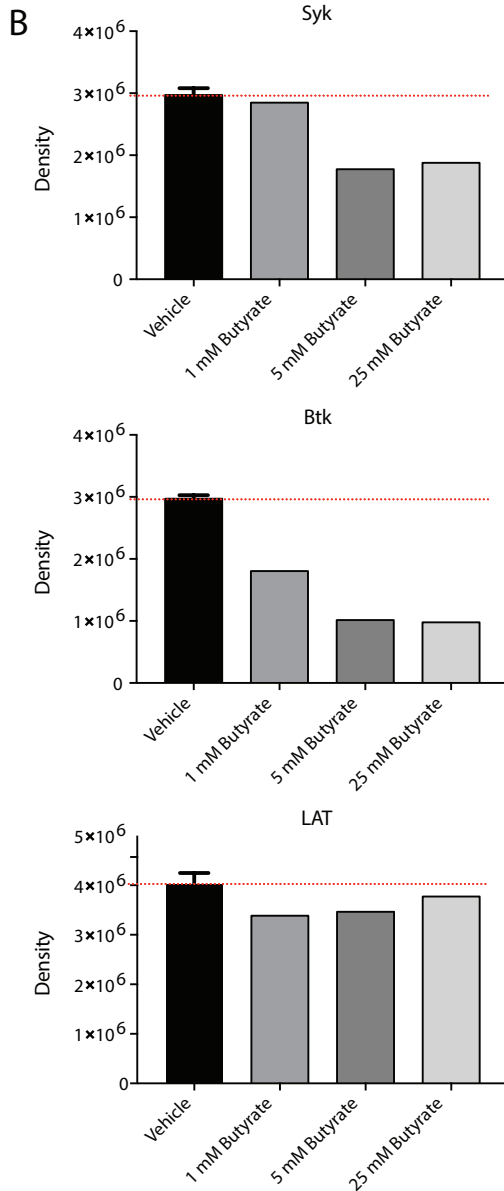

**C**

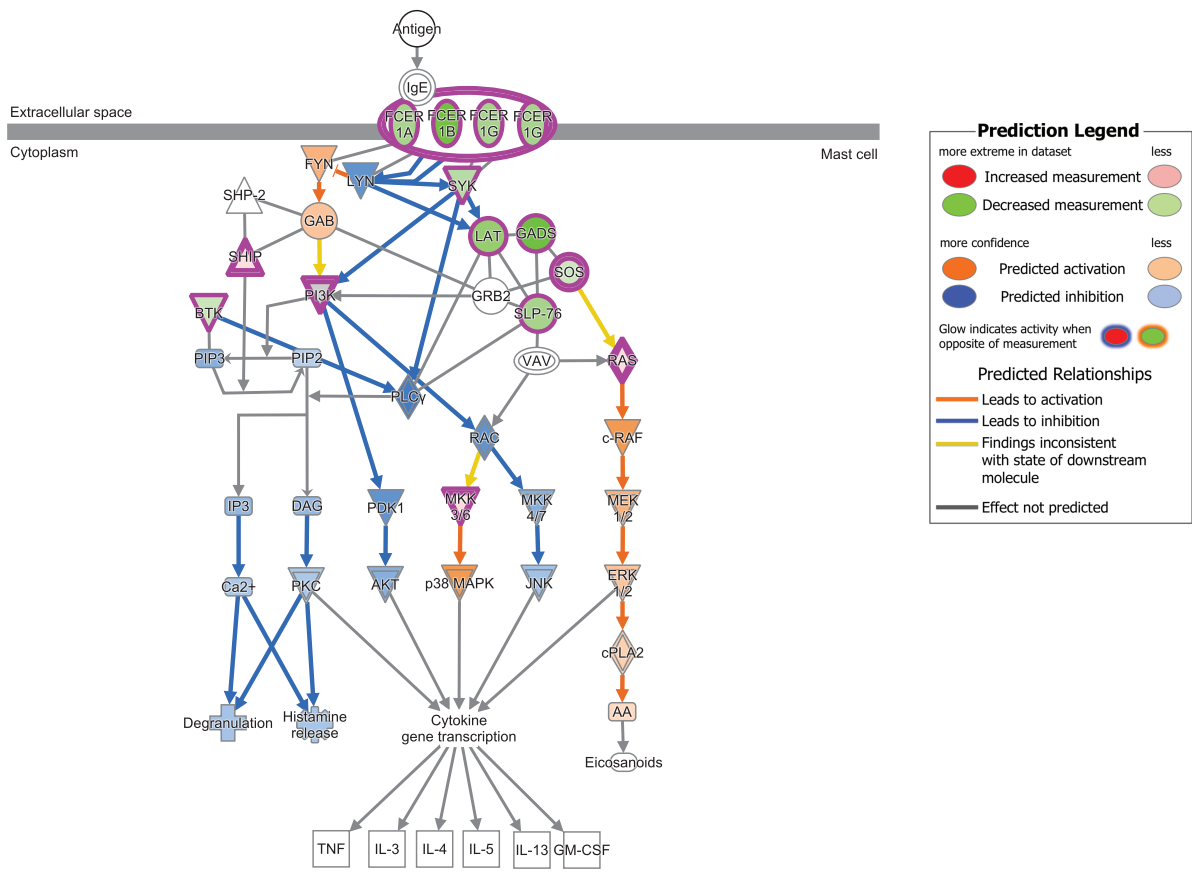

Supplement: NIHMS1647792-supplement-Figure_S4.pdf [file NIHMS1647792-supplement-Figure_S4.pdf]

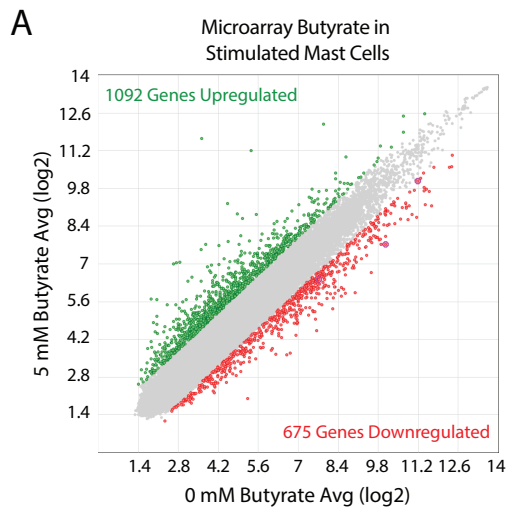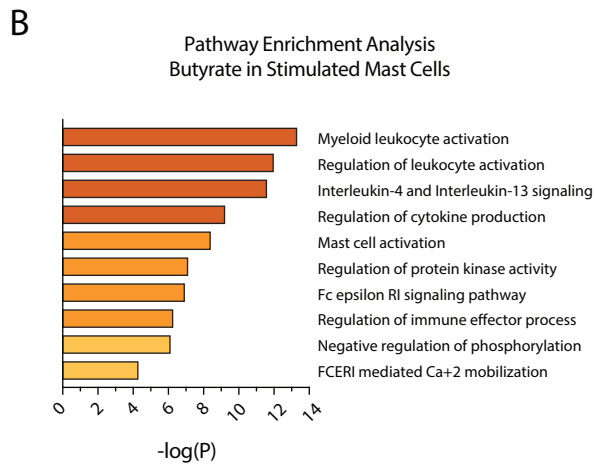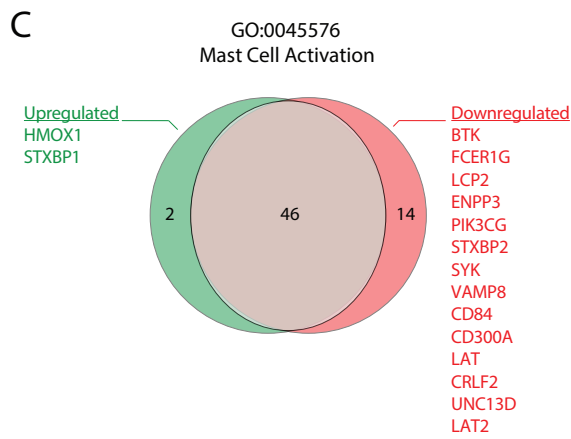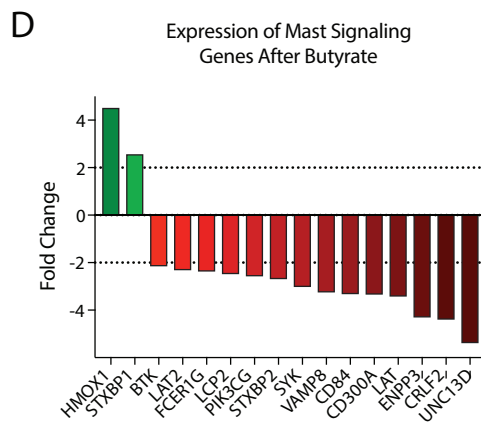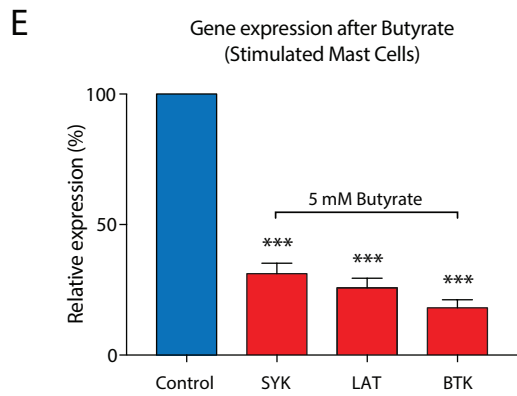

Supplement: NIHMS1647792-supplement-Figure_S5.pdf [file NIHMS1647792-supplement-Figure_S5.pdf]

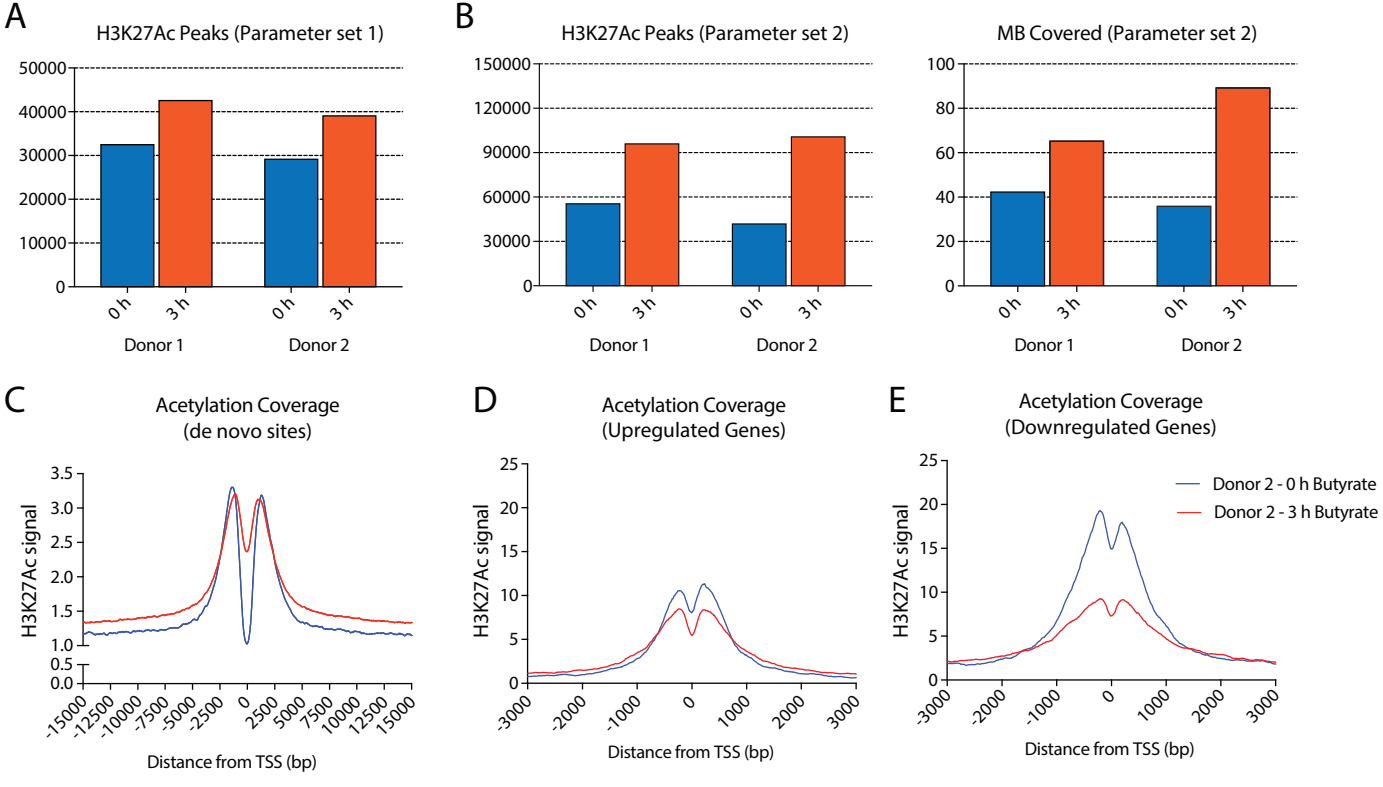

Supplement: NIHMS1647792-supplement-Figure_S6.pdf [file NIHMS1647792-supplement-Figure_S6.pdf]
